# Supplementary material
Source: PubMed Central journal article supplement (PMC5207039)
Supplement: NIHMS837814-supplement-Table_S1.pdf [file NIHMS837814-supplement-Table_S1.pdf]

## Supplementary Table S1

miRNAs abundance in RMS and muscle. Relative abundance of miRNAs across all sample types (normal muscle, ARMS, ERMS, PRMS and cell lines), expressed as mean percentage of total clone counts for each specimen. MiRNAs expressed at undetectable levels are omitted from each respective list.

| MUSCLE          |                   | ERMS            |                   | ARMS            |                   | PRMS            |                   | RMS cell lines  |                   |
|-----------------|-------------------|-----------------|-------------------|-----------------|-------------------|-----------------|-------------------|-----------------|-------------------|
| miRNA           | Average abundance |
| hsa-miR-1       | 36,569%           | hsa-let-7b      | 9,9840%           | hsa-let-7a      | 9,2070%           | hsa-miR-21      | 28,241%           | hsa-miR-19b     | 11,235%           |
| hsa-miR-133a    | 20,063%           | hsa-let-7a      | 9,1959%           | hsa-let-7b      | 8,0118%           | hsa-miR-199a-3p | 4,916%            | hsa-miR-19a     | 6,050%            |
| hsa-miR-378     | 4,012%            | hsa-miR-125b    | 7,4790%           | hsa-miR-21      | 6,1789%           | hsa-miR-199a-5p | 4,407%            | hsa-miR-21      | 5,557%            |
| hsa-miR-206     | 3,154%            | hsa-miR-92a     | 4,1987%           | hsa-miR-125b    | 4,2097%           | hsa-let-7a      | 3,938%            | hsa-miR-17      | 3,964%            |
| hsa-miR-22      | 2,567%            | hsa-miR-21      | 3,7478%           | hsa-miR-206     | 3,5246%           | hsa-miR-206     | 3,699%            | hsa-miR-199a-5p | 3,704%            |
| hsa-miR-143     | 2,397%            | hsa-miR-146b    | 3,6974%           | hsa-miR-24      | 2,2909%           | hsa-miR-125b    | 3,172%            | hsa-miR-92a     | 2,608%            |
| hsa-miR-451     | 2,311%            | hsa-miR-483-3p  | 3,1933%           | hsa-let-7i      | 2,2075%           | hsa-miR-199b    | 2,455%            | hsa-miR-199a-3p | 2,603%            |
| hsa-miR-26a     | 1,925%            | hsa-miR-199a-5p | 3,0738%           | hsa-miR-26a     | 2,0398%           | hsa-miR-19b     | 1,939%            | hsa-miR-18a     | 2,501%            |
| hsa-miR-29a     | 1,848%            | hsa-let-7c      | 3,0693%           | hsa-miR-133a    | 1,9249%           | hsa-miR-26a     | 1,763%            | hsa-miR-20a     | 2,457%            |
| hsa-let-7a      | 1,643%            | hsa-miR-199a-3p | 2,9848%           | hsa-let-7f      | 1,7896%           | hsa-let-7f      | 1,621%            | hsa-let-7a      | 2,074%            |
| hsa-miR-30a     | 1,502%            | hsa-miR-320     | 2,1668%           | hsa-miR-143     | 1,7536%           | hsa-let-7b      | 1,554%            | hsa-miR-103     | 1,902%            |
| hsa-miR-101     | 1,494%            | hsa-let-7i      | 1,9297%           | hsa-let-7g      | 1,7165%           | hsa-let-7c      | 1,503%            | hsa-miR-206     | 1,812%            |
| hsa-miR-24      | 1,380%            | hsa-miR-26a     | 1,6075%           | hsa-miR-92a     | 1,5638%           | hsa-miR-99a     | 1,243%            | hsa-miR-24      | 1,684%            |
| hsa-miR-27b     | 1,339%            | hsa-miR-199b    | 1,4870%           | hsa-miR-199a-3p | 1,4968%           | hsa-miR-24      | 1,236%            | hsa-miR-27b     | 1,601%            |
| hsa-let-7b      | 1,240%            | hsa-miR-125a    | 1,4382%           | hsa-let-7c      | 1,4453%           | hsa-miR-143     | 1,133%            | hsa-let-7i      | 1,560%            |
| hsa-miR-30d     | 1,032%            | hsa-miR-24      | 1,1982%           | hsa-miR-1       | 1,3787%           | hsa-miR-92a     | 1,110%            | hsa-miR-26a     | 1,552%            |
| hsa-let-7f      | 0,920%            | hsa-miR-451     | 1,1354%           | hsa-miR-127-3p  | 1,3466%           | hsa-miR-17      | 1,080%            | hsa-miR-106b    | 1,490%            |
| hsa-miR-21      | 0,876%            | hsa-miR-206     | 1,1135%           | hsa-miR-451     | 1,2955%           | hsa-miR-93      | 0,969%            | hsa-miR-93      | 1,395%            |
| hsa-miR-126     | 0,767%            | hsa-miR-181a    | 1,1056%           | hsa-miR-22      | 1,2787%           | hsa-miR-19a     | 0,957%            | hsa-miR-125b    | 1,380%            |
| hsa-miR-486-5p  | 0,714%            | hsa-let-7g      | 1,0142%           | hsa-miR-199a-5p | 1,2763%           | hsa-miR-27a     | 0,940%            | hsa-miR-127-3p  | 1,297%            |
| hsa-miR-30c     | 0,687%            | hsa-let-7e      | 0,9979%           | hsa-miR-30d     | 1,1919%           | hsa-miR-101     | 0,875%            | hsa-miR-199b    | 1,297%            |
| hsa-miR-30e     | 0,674%            | hsa-miR-19b     | 0,9496%           | hsa-miR-483-3p  | 1,0608%           | hsa-miR-106b    | 0,867%            | hsa-miR-320     | 1,135%            |
| hsa-miR-125b    | 0,652%            | hsa-miR-27b     | 0,9136%           | hsa-miR-27a     | 1,0562%           | hsa-miR-20a     | 0,863%            | hsa-let-7f      | 0,917%            |
| hsa-miR-27a     | 0,581%            | hsa-miR-99a     | 0,9055%           | hsa-miR-27b     | 0,9940%           | hsa-let-7g      | 0,831%            | hsa-miR-29a     | 0,865%            |
| hsa-let-7i      | 0,525%            | hsa-miR-375     | 0,8686%           | hsa-miR-19b     | 0,9692%           | hsa-miR-128     | 0,792%            | hsa-miR-221     | 0,833%            |
| hsa-let-7g      | 0,505%            | hsa-miR-143     | 0,8429%           | hsa-miR-126     | 0,9346%           | hsa-let-7i      | 0,755%            | hsa-miR-22      | 0,797%            |
| hsa-miR-499     | 0,416%            | hsa-miR-30d     | 0,8395%           | hsa-miR-181a    | 0,9260%           | hsa-miR-29a     | 0,749%            | hsa-miR-130a    | 0,786%            |
| hsa-miR-30b     | 0,389%            | hsa-let-7f      | 0,8280%           | hsa-miR-148a    | 0,9115%           | hsa-miR-148a    | 0,748%            | hsa-miR-99a     | 0,786%            |
| hsa-miR-16      | 0,365%            | hsa-miR-335-3p  | 0,8217%           | hsa-miR-29a     | 0,8829%           | hsa-miR-93      | 0,730%            | hsa-miR-25      | 0,775%            |
| hsa-miR-29c     | 0,347%            | hsa-miR-93      | 0,8187%           | hsa-miR-378     | 0,8746%           | hsa-miR-483-3p  | 0,650%            | hsa-miR-30e     | 0,753%            |
| hsa-miR-99a     | 0,337%            | hsa-miR-17      | 0,7778%           | hsa-miR-142-3p  | 0,8394%           | hsa-miR-103     | 0,650%            | hsa-miR-381     | 0,704%            |
| hsa-miR-133b    | 0,332%            | hsa-miR-103     | 0,7209%           | hsa-miR-30a     | 0,8373%           | hsa-miR-30e     | 0,644%            | hsa-miR-27a     | 0,686%            |
| hsa-miR-23b     | 0,285%            | hsa-miR-423-3p  | 0,7143%           | hsa-miR-23a     | 0,8343%           | hsa-miR-140-3p  | 0,639%            | hsa-let-7d      | 0,631%            |
| hsa-miR-26b     | 0,278%            | hsa-miR-126     | 0,6924%           | hsa-let-7d      | 0,8256%           | hsa-miR-18a     | 0,594%            | hsa-miR-101     | 0,627%            |
| hsa-miR-23a     | 0,225%            | hsa-miR-25      | 0,6639%           | hsa-miR-128     | 0,7698%           | hsa-miR-181a    | 0,585%            | hsa-let-7b      | 0,600%            |
| hsa-miR-92a     | 0,224%            | hsa-let-7d      | 0,6594%           | hsa-miR-199b    | 0,7474%           | hsa-miR-30d     | 0,585%            | hsa-let-7g      | 0,595%            |
| hsa-miR-19b     | 0,217%            | hsa-miR-23a     | 0,5892%           | hsa-miR-99a     | 0,7435%           | hsa-miR-142-3p  | 0,577%            | hsa-miR-100     | 0,571%            |
| hsa-miR-199a-5p | 0,203%            | hsa-miR-29a     | 0,5760%           | hsa-miR-381     | 0,7303%           | hsa-miR-130a    | 0,575%            | hsa-miR-660     | 0,543%            |
| hsa-miR-10b     | 0,195%            | hsa-miR-27a     | 0,5423%           | hsa-miR-320     | 0,7068%           | hsa-miR-146b    | 0,563%            | hsa-miR-16      | 0,513%            |
| hsa-let-7d      | 0,184%            | hsa-miR-106b    | 0,4247%           | hsa-miR-26b     | 0,6755%           | hsa-miR-26b     | 0,540%            | hsa-miR-378     | 0,510%            |
| hsa-miR-95      | 0,182%            | hsa-miR-19a     | 0,4135%           | hsa-miR-146b    | 0,6267%           | hsa-let-7e      | 0,538%            | hsa-miR-376c    | 0,479%            |
| hsa-miR-193b    | 0,173%            | hsa-miR-30c     | 0,4098%           | hsa-miR-30c     | 0,5753%           | hsa-miR-424     | 0,467%            | hsa-miR-424     | 0,467%            |
| hsa-miR-199a-3p | 0,166%            | hsa-miR-23b     | 0,4093%           | hsa-miR-17      | 0,5609%           | hsa-miR-186     | 0,450%            | hsa-miR-186     | 0,450%            |
| hsa-miR-128     | 0,158%            | hsa-miR-26b     | 0,4078%           | hsa-miR-660     | 0,5549%           | hsa-miR-181a    | 0,436%            | hsa-miR-181a    | 0,436%            |
| hsa-let-7c      | 0,151%            | hsa-miR-100     | 0,4077%           | hsa-miR-101     | 0,5546%           | hsa-miR-10b     | 0,508%            | hsa-miR-183     | 0,425%            |
| hsa-miR-144     | 0,140%            | hsa-miR-99b     | 0,4010%           | hsa-miR-125a    | 0,5216%           | hsa-miR-191     | 0,505%            | hsa-miR-148a    | 0,419%            |
| hsa-miR-103     | 0,138%            | hsa-miR-16      | 0,3841%           | hsa-miR-150     | 0,4911%           | hsa-miR-30c     | 0,491%            | hsa-miR-423-3p  | 0,418%            |
| hsa-miR-320     | 0,138%            | hsa-miR-22      | 0,3699%           | hsa-miR-532     | 0,4646%           | hsa-miR-23a     | 0,467%            | hsa-miR-182     | 0,414%            |
| hsa-miR-140-3p  | 0,136%            | hsa-miR-744     | 0,3651%           | hsa-miR-16      | 0,4030%           | hsa-miR-140-5p  | 0,447%            | hsa-let-7c      | 0,404%            |

|                        |                        |                        |                       |                        |
|------------------------|------------------------|------------------------|-----------------------|------------------------|
| hsa-miR-423-3p 0,116%  | hsa-miR-197 0,3647%    | hsa-miR-34a 0,3888%    | hsa-miR-25 0,417%     | hsa-miR-33a 0,398%     |
| hsa-miR-93 0,103%      | hsa-miR-149 0,3615%    | hsa-miR-103 0,3845%    | hsa-miR-22 0,415%     | hsa-miR-30c 0,398%     |
| hsa-miR-152 0,098%     | hsa-miR-424 0,3487%    | hsa-miR-423-3p 0,3828% | hsa-miR-320 0,376%    | hsa-miR-9 0,395%       |
| hsa-miR-151-5p 0,098%  | hsa-miR-127-3p 0,3411% | hsa-miR-376c 0,3757%   | hsa-miR-126 0,362%    | hsa-miR-128 0,395%     |
| hsa-miR-145 0,092%     | hsa-miR-10b 0,3289%    | hsa-miR-25 0,3747%     | hsa-miR-30a 0,341%    | hsa-miR-23b 0,374%     |
| hsa-miR-148a 0,091%    | hsa-miR-151-5p 0,3103% | hsa-miR-19a 0,3733%    | hsa-miR-100 0,341%    | hsa-miR-30a 0,373%     |
| hsa-miR-29b 0,091%     | hsa-miR-148b 0,3037%   | hsa-miR-486-5p 0,3686% | hsa-miR-196b 0,341%   | hsa-miR-10b 0,365%     |
| hsa-miR-199b 0,083%    | hsa-miR-133a 0,2929%   | hsa-miR-221 0,3659%    | hsa-miR-99b 0,337%    | hsa-miR-335-3p 0,363%  |
| hsa-miR-25 0,082%      | hsa-miR-30b 0,2905%    | hsa-miR-106b 0,3578%   | hsa-miR-183 0,330%    | hsa-miR-151-3p 0,347%  |
| hsa-miR-15a 0,079%     | hsa-miR-191 0,2891%    | hsa-miR-93 0,3555%     | hsa-miR-660 0,312%    | hsa-miR-222 0,342%     |
| hsa-miR-365 0,074%     | hsa-miR-30a 0,2644%    | hsa-miR-23b 0,3547%    | hsa-miR-133a 0,307%   | hsa-miR-532 0,338%     |
| hsa-miR-486-3p 0,073%  | hsa-miR-20a 0,2644%    | hsa-miR-30e 0,3518%    | hsa-miR-221 0,304%    | hsa-miR-301a 0,337%    |
| hsa-miR-191 0,073%     | hsa-miR-130a 0,2520%   | hsa-miR-148b 0,3466%   | hsa-miR-23b 0,296%    | hsa-miR-23a 0,336%     |
| hsa-miR-20a 0,072%     | hsa-miR-484 0,2515%    | hsa-miR-191 0,3390%    | hsa-miR-191 0,295%    | hsa-miR-26b 0,332%     |
| hsa-miR-100 0,071%     | hsa-miR-183 0,2281%    | hsa-miR-149 0,3359%    | hsa-miR-16 0,285%     | hsa-miR-369 0,325%     |
| hsa-miR-186 0,069%     | hsa-miR-497 0,2235%    | hsa-miR-375 0,3305%    | hsa-miR-186 0,274%    | hsa-miR-30d 0,324%     |
| hsa-miR-106b 0,064%    | hsa-miR-182 0,2218%    | hsa-miR-100 0,3137%    | hsa-miR-182 0,269%    | hsa-miR-15a 0,323%     |
| hsa-miR-125a 0,060%    | hsa-miR-221 0,2186%    | hsa-miR-493-5p 0,2952% | hsa-miR-152 0,260%    | hsa-miR-30b 0,322%     |
| hsa-miR-374a 0,057%    | hsa-miR-30e 0,2162%    | hsa-miR-30b 0,2949%    | hsa-miR-30b 0,253%    | hsa-miR-654 0,317%     |
| hsa-miR-497 0,052%     | hsa-miR-193b 0,2135%   | hsa-let-7e 0,2861%     | hsa-miR-196a 0,252%   | hsa-miR-148b 0,306%    |
| hsa-miR-151-3p 0,051%  | hsa-miR-101 0,2114%    | hsa-miR-424 0,2788%    | hsa-miR-151-5p 0,244% | hsa-miR-133a 0,302%    |
| hsa-miR-221 0,049%     | hsa-miR-381 0,2093%    | hsa-miR-133b 0,2778%   | hsa-miR-451 0,244%    | hsa-miR-191 0,301%     |
| hsa-miR-28-3p 0,049%   | hsa-miR-486-5p 0,2054% | hsa-miR-362-5p 0,2767% | hsa-miR-335-3p 0,243% | hsa-miR-335-5p 0,300%  |
| hsa-miR-181a 0,048%    | hsa-miR-15b 0,1962%    | hsa-miR-130a 0,2742%   | hsa-miR-10a 0,203%    | hsa-let-7e 0,287%      |
| hsa-miR-424 0,048%     | hsa-miR-140-3p 0,1917% | hsa-miR-500-3p 0,2713% | hsa-miR-499 0,201%    | hsa-miR-409-3p 0,273%  |
| hsa-miR-19a 0,047%     | hsa-miR-574-3p 0,1894% | hsa-miR-9 0,2616%      | hsa-miR-222 0,199%    | hsa-miR-127-5p 0,265%  |
| hsa-miR-140-5p 0,045%  | hsa-miR-10a 0,1886%    | hsa-miR-654 0,2616%    | hsa-let-7d 0,198%     | hsa-miR-214-5p 0,260%  |
| hsa-miR-17 0,045%      | hsa-miR-1 0,1877%      | hsa-miR-142-5p 0,2593% | hsa-miR-133b 0,192%   | hsa-miR-483-3p 0,260%  |
| hsa-miR-223 0,043%     | hsa-miR-335-5p 0,1761% | hsa-miR-183 0,2474%    | hsa-miR-148b 0,181%   | hsa-miR-483-5p 0,260%  |
| hsa-miR-150 0,043%     | hsa-miR-18a 0,1666%    | hsa-miR-501-5p 0,2434% | hsa-miR-301a 0,153%   | hsa-miR-96 0,247%      |
| hsa-miR-185 0,043%     | hsa-miR-214-5p 0,1614% | hsa-miR-20a 0,2366%    | hsa-miR-503 0,146%    | hsa-miR-196b 0,244%    |
| hsa-miR-142-3p 0,039%  | hsa-miR-502 0,1603%    | hsa-miR-502 0,2299%    | hsa-miR-532 0,144%    | hsa-miR-151-5p 0,241%  |
| hsa-miR-361-5p 0,038%  | hsa-miR-151-3p 0,1558% | hsa-miR-10b 0,2285%    | hsa-miR-151-3p 0,139% | hsa-miR-374a 0,241%    |
| hsa-miR-196a 0,038%    | hsa-miR-96 0,1531%     | hsa-miR-151-5p 0,2277% | hsa-miR-214-5p 0,138% | hsa-miR-99b 0,234%     |
| hsa-miR-10a 0,036%     | hsa-miR-128 0,1429%    | hsa-miR-432 0,2228%    | hsa-miR-484 0,132%    | hsa-miR-181b 0,226%    |
| hsa-miR-331-3p 0,035%  | hsa-miR-504 0,1406%    | hsa-miR-182 0,2170%    | hsa-miR-29b 0,121%    | hsa-miR-708 0,225%     |
| hsa-miR-28-5p 0,034%   | hsa-miR-181b 0,1378%   | hsa-miR-409-3p 0,2169% | hsa-miR-146a 0,108%   | hsa-miR-130b 0,218%    |
| hsa-miR-196b 0,033%    | hsa-miR-423-5p 0,1359% | hsa-miR-145 0,2129%    | hsa-miR-542-3p 0,105% | hsa-miR-376b 0,214%    |
| hsa-miR-423-5p 0,033%  | hsa-miR-500-3p 0,1321% | hsa-miR-18a 0,2119%    | hsa-miR-374a 0,105%   | hsa-miR-196a 0,212%    |
| hsa-miR-503 0,032%     | hsa-miR-200c 0,1308%   | hsa-miR-186 0,2088%    | hsa-miR-497 0,102%    | hsa-miR-133b 0,207%    |
| hsa-miR-148b 0,031%    | hsa-miR-135b 0,1298%   | hsa-miR-497 0,2046%    | hsa-miR-362-5p 0,100% | hsa-miR-379 0,193%     |
| hsa-miR-195 0,030%     | hsa-miR-186 0,1284%    | hsa-miR-370 0,1973%    | hsa-miR-374b 0,095%   | hsa-miR-136-3p 0,185%  |
| hsa-miR-328 0,028%     | hsa-miR-92b 0,1264%    | hsa-miR-193b 0,1918%   | hsa-miR-378 0,094%    | hsa-miR-377 0,181%     |
| hsa-miR-127-3p 0,026%  | hsa-miR-654 0,1242%    | hsa-miR-487b 0,1867%   | hsa-miR-181b 0,093%   | hsa-miR-29b 0,179%     |
| hsa-miR-660 0,025%     | hsa-miR-222 0,1218%    | hsa-miR-503 0,1822%    | hsa-miR-454 0,090%    | hsa-miR-135b 0,178%    |
| hsa-miR-98 0,024%      | hsa-miR-145 0,1205%    | hsa-miR-501-3p 0,1778% | hsa-miR-142-5p 0,090% | hsa-miR-1 0,178%       |
| hsa-let-7e 0,024%      | hsa-miR-532 0,1187%    | hsa-miR-345 0,1744%    | hsa-miR-130b 0,090%   | hsa-miR-136-5p 0,175%  |
| hsa-miR-222 0,023%     | hsa-miR-378 0,1183%    | hsa-miR-140-3p 0,1734% | hsa-miR-361-5p 0,088% | hsa-miR-376a 0,162%    |
| hsa-miR-190 0,020%     | hsa-miR-660 0,1179%    | hsa-miR-335-5p 0,1727% | hsa-miR-149 0,085%    | hsa-miR-376a-3p 0,162% |
| hsa-miR-99b 0,019%     | hsa-miR-483-5p 0,1150% | hsa-miR-29c 0,1710%    | hsa-miR-218 0,083%    | hsa-miR-125a 0,156%    |
| hsa-miR-652 0,017%     | hsa-miR-361-5p 0,1125% | hsa-miR-500-5p 0,1686% | hsa-miR-34a 0,082%    | hsa-miR-503 0,148%     |
| hsa-miR-139 0,016%     | hsa-miR-409-3p 0,1119% | hsa-miR-29b 0,1573%    | hsa-miR-342 0,073%    | hsa-miR-98 0,147%      |
| hsa-miR-491 0,016%     | hsa-miR-501-3p 0,1116% | hsa-miR-335-3p 0,1567% | hsa-miR-98 0,073%     | hsa-miR-362-5p 0,143%  |
| hsa-miR-374b 0,016%    | hsa-miR-708 0,1113%    | hsa-miR-222 0,1533%    | hsa-miR-188-5p 0,072% | hsa-miR-7 0,143%       |
| hsa-miR-362-5p 0,016%  | hsa-miR-214-3p 0,1100% | hsa-miR-323 0,1464%    | hsa-miR-502 0,072%    | hsa-miR-218 0,135%     |
| hsa-miR-193a-5p 0,014% | hsa-miR-15a 0,1085%    | hsa-miR-369 0,1397%    | hsa-miR-423-3p 0,070% | hsa-miR-140-3p 0,135%  |
| hsa-miR-483-5p 0,014%  | hsa-miR-9 0,1083%      | hsa-miR-136-3p 0,1382% | hsa-miR-224 0,067%    | hsa-miR-138 0,133%     |

|                 |        |                 |         |                 |         |                |        |                |        |
|-----------------|--------|-----------------|---------|-----------------|---------|----------------|--------|----------------|--------|
| hsa-miR-574-5p  | 0,014% | hsa-miR-193a-5p | 0,1076% | hsa-miR-99b     | 0,1356% | hsa-miR-28-5p  | 0,067% | hsa-miR-10a    | 0,129% |
| hsa-miR-422a    | 0,014% | hsa-miR-501-5p  | 0,1062% | hsa-miR-484     | 0,1349% | hsa-miR-32     | 0,067% | hsa-miR-339-5p | 0,125% |
| hsa-miR-18a     | 0,013% | hsa-miR-150     | 0,1043% | hsa-miR-181b    | 0,1312% | hsa-miR-324-5p | 0,066% | hsa-miR-502    | 0,124% |
| hsa-miR-20b     | 0,013% | hsa-miR-142-3p  | 0,0925% | hsa-miR-411-5p  | 0,1304% | hsa-miR-501-5p | 0,066% | hsa-miR-301b   | 0,124% |
| hsa-miR-32      | 0,013% | hsa-miR-196a    | 0,0908% | hsa-miR-342     | 0,1297% | hsa-miR-96     | 0,066% | hsa-miR-493-5p | 0,123% |
| hsa-miR-142-5p  | 0,012% | hsa-miR-34a     | 0,0876% | hsa-miR-433     | 0,1273% | hsa-miR-500-3p | 0,066% | hsa-miR-374b   | 0,123% |
| hsa-miR-208b    | 0,011% | hsa-miR-503     | 0,0867% | hsa-miR-379     | 0,1201% | hsa-miR-301b   | 0,062% | hsa-miR-486-5p | 0,122% |
| hsa-miR-345     | 0,011% | hsa-miR-152     | 0,0867% | hsa-miR-210     | 0,1182% | hsa-miR-92b    | 0,061% | hsa-miR-323    | 0,121% |
| hsa-miR-197     | 0,011% | hsa-miR-374a    | 0,0852% | hsa-miR-361-5p  | 0,1173% | hsa-miR-500-5p | 0,060% | hsa-miR-425    | 0,118% |
| hsa-miR-885-5p  | 0,011% | hsa-miR-342     | 0,0826% | hsa-miR-152     | 0,1139% | hsa-miR-425    | 0,059% | hsa-miR-410    | 0,117% |
| hsa-miR-363     | 0,010% | hsa-miR-365     | 0,0811% | hsa-miR-493-3p  | 0,1126% | hsa-miR-29c    | 0,058% | hsa-miR-329    | 0,116% |
| hsa-miR-107     | 0,009% | hsa-miR-223     | 0,0783% | hsa-miR-376a    | 0,1121% | hsa-miR-15a    | 0,054% | hsa-miR-107    | 0,115% |
| hsa-miR-675     | 0,009% | hsa-miR-500-5p  | 0,0763% | hsa-miR-376a-3p | 0,1121% | hsa-miR-450a   | 0,053% | hsa-miR-185    | 0,114% |
| hsa-miR-339-5p  | 0,009% | hsa-miR-493-5p  | 0,0715% | hsa-miR-15a     | 0,1105% | hsa-miR-197    | 0,052% | hsa-miR-665    | 0,113% |
| hsa-miR-532     | 0,009% | hsa-miR-144     | 0,0706% | hsa-miR-144     | 0,1092% | hsa-miR-340    | 0,050% | hsa-miR-411-5p | 0,112% |
| hsa-miR-944-3p  | 0,009% | hsa-miR-29c     | 0,0692% | hsa-miR-542-3p  | 0,1090% | hsa-miR-483-5p | 0,047% | hsa-miR-542-3p | 0,112% |
| hsa-miR-136-3p  | 0,008% | hsa-miR-133b    | 0,0688% | hsa-miR-483-5p  | 0,1087% | hsa-miR-214-3p | 0,047% | hsa-miR-370    | 0,112% |
| hsa-miR-218     | 0,008% | hsa-miR-485-3p  | 0,0685% | hsa-miR-136-5p  | 0,1075% | hsa-miR-106a   | 0,046% | hsa-miR-345    | 0,107% |
| hsa-miR-15b     | 0,008% | hsa-miR-107     | 0,0675% | hsa-miR-151-3p  | 0,1042% | hsa-miR-193b   | 0,043% | hsa-miR-324-5p | 0,106% |
| hsa-miR-425     | 0,008% | hsa-miR-339-5p  | 0,0617% | hsa-miR-377     | 0,0953% | hsa-miR-190    | 0,043% | hsa-miR-494    | 0,104% |
| hsa-miR-502     | 0,008% | hsa-miR-328     | 0,0615% | hsa-miR-96      | 0,0888% | hsa-miR-501-3p | 0,042% | hsa-miR-484    | 0,102% |
| hsa-miR-210     | 0,007% | hsa-miR-141     | 0,0603% | hsa-miR-382-5p  | 0,0883% | hsa-miR-708    | 0,042% | hsa-miR-149    | 0,102% |
| hsa-miR-324-5p  | 0,007% | hsa-miR-432     | 0,0592% | hsa-miR-196a    | 0,0873% | hsa-miR-155    | 0,040% | hsa-miR-501-3p | 0,101% |
| hsa-miR-187-5p  | 0,007% | hsa-miR-487b    | 0,0590% | hsa-miR-329     | 0,0872% | hsa-miR-331-3p | 0,039% | hsa-miR-500-3p | 0,098% |
| hsa-miR-299-3p  | 0,007% | hsa-miR-455     | 0,0568% | hsa-miR-374a    | 0,0868% | hsa-miR-145    | 0,037% | hsa-miR-106a   | 0,097% |
| hsa-miR-34a     | 0,007% | hsa-miR-331-3p  | 0,0556% | hsa-miR-140-5p  | 0,0848% | hsa-miR-450b   | 0,036% | hsa-miR-487b   | 0,096% |
| hsa-miR-377     | 0,007% | hsa-miR-210     | 0,0541% | hsa-miR-376b    | 0,0838% | hsa-miR-223    | 0,036% | hsa-miR-134    | 0,096% |
| hsa-miR-512-3p  | 0,007% | hsa-miR-324-5p  | 0,0531% | hsa-miR-130b    | 0,0836% | hsa-miR-365    | 0,036% | hsa-miR-15b    | 0,095% |
| hsa-miR-628-3p  | 0,007% | hsa-miR-377     | 0,0530% | hsa-miR-324-5p  | 0,0828% | hsa-miR-214-3p | 0,034% | hsa-miR-214-3p | 0,095% |
| hsa-miR-874     | 0,007% | hsa-miR-139     | 0,0530% | hsa-miR-98      | 0,0823% | hsa-miR-150    | 0,033% | hsa-miR-873    | 0,092% |
| hsa-miR-339-3p  | 0,007% | hsa-miR-376c    | 0,0520% | hsa-miR-188-5p  | 0,0811% | hsa-miR-185    | 0,031% | hsa-miR-188-5p | 0,090% |
| hsa-miR-182     | 0,006% | hsa-miR-362-5p  | 0,0519% | hsa-miR-127-5p  | 0,0808% | hsa-miR-195    | 0,031% | hsa-miR-769    | 0,090% |
| hsa-miR-324-3p  | 0,006% | hsa-miR-652     | 0,0511% | hsa-miR-146a    | 0,0806% | hsa-miR-20b    | 0,028% | hsa-miR-193b   | 0,090% |
| hsa-miR-500-3p  | 0,006% | hsa-miR-374b    | 0,0506% | hsa-miR-574-3p  | 0,0800% | hsa-miR-339-5p | 0,028% | hsa-miR-32     | 0,089% |
| hsa-miR-194     | 0,005% | hsa-miR-345     | 0,0503% | hsa-miR-197     | 0,0792% | hsa-miR-144    | 0,028% | hsa-miR-431    | 0,088% |
| hsa-miR-381     | 0,005% | hsa-miR-29b     | 0,0498% | hsa-miR-223     | 0,0788% | hsa-miR-107    | 0,027% | hsa-miR-501-5p | 0,087% |
| hsa-miR-935     | 0,005% | hsa-miR-195     | 0,0494% | hsa-miR-299-5p  | 0,0750% | hsa-miR-362-3p | 0,027% | hsa-miR-299-3p | 0,087% |
| hsa-miR-361-3p  | 0,005% | hsa-miR-146a    | 0,0489% | hsa-miR-410     | 0,0736% | hsa-miR-615    | 0,027% | hsa-miR-432    | 0,087% |
| hsa-miR-615     | 0,005% | hsa-miR-98      | 0,0482% | hsa-miR-365     | 0,0696% | hsa-miR-194    | 0,026% | hsa-miR-382-5p | 0,086% |
| hsa-miR-33a     | 0,005% | hsa-miR-329     | 0,0474% | hsa-miR-95      | 0,0687% | hsa-miR-139    | 0,026% | hsa-miR-126    | 0,084% |
| hsa-miR-484     | 0,005% | hsa-miR-324-3p  | 0,0447% | hsa-miR-374b    | 0,0649% | hsa-miR-345    | 0,025% | hsa-miR-454    | 0,083% |
| hsa-miR-146a    | 0,004% | hsa-miR-296-3p  | 0,0443% | hsa-miR-28-3p   | 0,0603% | hsa-miR-28-3p  | 0,025% | hsa-miR-152    | 0,082% |
| hsa-miR-708     | 0,004% | hsa-miR-34c     | 0,0442% | hsa-miR-10a     | 0,0600% | hsa-miR-590-3p | 0,025% | hsa-miR-409-5p | 0,081% |
| hsa-miR-106a    | 0,004% | hsa-miR-323     | 0,0441% | hsa-miR-299-3p  | 0,0597% | hsa-miR-887    | 0,024% | hsa-miR-361-5p | 0,079% |
| hsa-miR-362-3p  | 0,004% | hsa-miR-130b    | 0,0438% | hsa-miR-450a    | 0,0587% | hsa-miR-132    | 0,022% | hsa-miR-140-5p | 0,078% |
| hsa-miR-340     | 0,004% | hsa-miR-485-5p  | 0,0425% | hsa-miR-494     | 0,0561% | hsa-miR-324-3p | 0,022% | hsa-miR-324-3p | 0,075% |
| hsa-miR-411-5p  | 0,004% | hsa-miR-941     | 0,0413% | hsa-miR-494     | 0,0561% | hsa-miR-652    | 0,022% | hsa-miR-7-5p   | 0,074% |
| hsa-miR-487b    | 0,004% | hsa-miR-124     | 0,0391% | hsa-miR-328     | 0,0557% | hsa-miR-452-5p | 0,020% | hsa-miR-337-3p | 0,074% |
| hsa-miR-590-5p  | 0,004% | hsa-miR-196b    | 0,0390% | hsa-miR-134     | 0,0546% | hsa-miR-363    | 0,019% | hsa-miR-758    | 0,068% |
| hsa-miR-181b    | 0,004% | hsa-miR-140-5p  | 0,0377% | hsa-miR-708     | 0,0542% | hsa-miR-598-3p | 0,019% | hsa-miR-423-5p | 0,067% |
| hsa-miR-342     | 0,004% | hsa-miR-543     | 0,0368% | hsa-miR-543     | 0,0541% | hsa-miR-744    | 0,019% | hsa-miR-362-3p | 0,066% |
| hsa-miR-379     | 0,004% | hsa-miR-886-5p  | 0,0368% | hsa-miR-331-3p  | 0,0541% | hsa-miR-7      | 0,018% | hsa-miR-450a   | 0,065% |
| hsa-miR-455     | 0,004% | hsa-miR-1226    | 0,0366% | hsa-miR-889     | 0,0534% | hsa-miR-423-5p | 0,017% | hsa-miR-154-3p | 0,064% |
| hsa-miR-9       | 0,004% | hsa-miR-301a    | 0,0365% | hsa-miR-362-3p  | 0,0530% | hsa-miR-452-3p | 0,017% | hsa-miR-652    | 0,064% |
| hsa-miR-376a    | 0,004% | hsa-miR-574-5p  | 0,0357% | hsa-miR-411-3p  | 0,0522% | hsa-miR-455    | 0,017% | hsa-miR-340    | 0,063% |
| hsa-miR-376a-3p | 0,004% | hsa-miR-155     | 0,0356% | hsa-miR-423-5p  | 0,0512% | hsa-miR-338    | 0,014% | hsa-miR-210    | 0,061% |
| hsa-miR-127-5p  | 0,003% | hsa-miR-200b    | 0,0356% | hsa-miR-339-5p  | 0,0512% | hsa-miR-361-3p | 0,014% | hsa-miR-143    | 0,061% |

|                       |                         |                         |                        |                        |
|-----------------------|-------------------------|-------------------------|------------------------|------------------------|
| hsa-miR-132 0,003%    | hsa-miR-615 0,0354%     | hsa-miR-363 0,0496%     | hsa-miR-375 0,014%     | hsa-miR-889 0,059%     |
| hsa-miR-183 0,003%    | hsa-miR-369 0,0351%     | hsa-miR-499 0,0483%     | hsa-miR-33a 0,014%     | hsa-miR-342 0,058%     |
| hsa-miR-190b 0,003%   | hsa-miR-299-3p 0,0337%  | hsa-miR-135a 0,0477%    | hsa-miR-376c 0,014%    | hsa-miR-487a 0,056%    |
| hsa-miR-331-5p 0,003% | hsa-miR-370 0,0329%     | hsa-miR-487a 0,0454%    | hsa-miR-379 0,014%     | hsa-miR-495 0,056%     |
| hsa-miR-409-3p 0,003% | hsa-miR-127-5p 0,0328%  | hsa-miR-155 0,0438%     | hsa-miR-574-3p 0,014%  | hsa-miR-324-3p 0,055%  |
| hsa-miR-452-5p 0,003% | hsa-miR-132 0,0322%     | hsa-miR-337-3p 0,0428%  | hsa-miR-574-5p 0,014%  | hsa-miR-598-3p 0,055%  |
| hsa-miR-504 0,003%    | hsa-miR-200a 0,0321%    | hsa-miR-28-5p 0,0409%   | hsa-miR-625 0,014%     | hsa-miR-505 0,054%     |
| hsa-miR-624-3p 0,003% | hsa-miR-433 0,0313%     | hsa-miR-495 0,0406%     | hsa-miR-135b 0,012%    | hsa-miR-744 0,053%     |
| hsa-miR-147b 0,002%   | hsa-miR-340 0,0296%     | hsa-miR-409-5p 0,0403%  | hsa-miR-629 0,012%     | hsa-miR-500-5p 0,052%  |
| hsa-miR-149 0,002%    | hsa-miR-28-5p 0,0293%   | hsa-miR-324-3p 0,0399%  | hsa-miR-873 0,012%     | hsa-miR-452-5p 0,051%  |
| hsa-miR-192 0,002%    | hsa-miR-218 0,0290%     | hsa-miR-542-5p 0,0376%  | hsa-miR-127-3p 0,012%  | hsa-miR-493-3p 0,051%  |
| hsa-miR-214-5p 0,002% | hsa-miR-411-5p 0,0278%  | hsa-miR-196b 0,0372%    | hsa-miR-9 0,012%       | hsa-miR-376a-5p 0,050% |
| hsa-miR-224 0,002%    | hsa-miR-362-3p 0,0274%  | hsa-miR-425 0,0363%     | hsa-miR-181c 0,011%    | hsa-miR-33b 0,047%     |
| hsa-miR-296-3p 0,002% | hsa-miR-671-3p 0,0274%  | hsa-miR-138 0,0362%     | hsa-miR-193a-5p 0,011% | hsa-miR-338 0,047%     |
| hsa-miR-450a 0,002%   | hsa-miR-28-3p 0,0273%   | hsa-miR-655 0,0360%     | hsa-miR-95 0,011%      | hsa-miR-514 0,046%     |
| hsa-miR-505 0,002%    | hsa-miR-134 0,0270%     | hsa-miR-106a 0,0358%    | hsa-miR-135a 0,009%    | hsa-miR-433 0,046%     |
| hsa-miR-574-3p 0,002% | hsa-miR-181c 0,0260%    | hsa-miR-339-3p 0,0355%  | hsa-miR-18b 0,009%     | hsa-miR-190 0,045%     |
| hsa-miR-590-3p 0,002% | hsa-miR-194 0,0259%     | hsa-miR-224 0,0344%     | hsa-miR-203-3p 0,009%  | hsa-miR-92b 0,042%     |
| hsa-miR-135a 0,002%   | hsa-miR-411-3p 0,0259%  | hsa-miR-15b 0,0343%     | hsa-miR-421 0,009%     | hsa-miR-539-3p 0,042%  |
| hsa-miR-155 0,002%    | hsa-miR-299-5p 0,0255%  | hsa-miR-195 0,0338%     | hsa-miR-490 0,009%     | hsa-miR-590-5p 0,041%  |
| hsa-miR-181c 0,002%   | hsa-miR-204 0,0255%     | hsa-miR-301a 0,0336%    | hsa-miR-491 0,009%     | hsa-miR-135a 0,040%    |
| hsa-miR-214-3p 0,002% | hsa-miR-505 0,0254%     | hsa-miR-340 0,0323%     | hsa-miR-511-3p 0,009%  | hsa-miR-411-3p 0,040%  |
| hsa-miR-335-5p 0,002% | hsa-miR-142-5p 0,0253%  | hsa-miR-154-3p 0,0308%  | hsa-miR-551b 0,009%    | hsa-miR-543 0,038%     |
| hsa-miR-493-3p 0,002% | hsa-miR-655 0,0253%     | hsa-miR-376a-5p 0,0306% | hsa-miR-891a 0,009%    | hsa-miR-629 0,038%     |
| hsa-miR-501-3p 0,002% | hsa-miR-376a 0,0252%    | hsa-miR-33a 0,0305%     | hsa-miR-941 0,009%     | hsa-miR-155 0,037%     |
| hsa-miR-511-3p 0,002% | hsa-miR-376a-3p 0,0252% | hsa-miR-574-5p 0,0299%  | hsa-miR-7-5p 0,009%    | hsa-miR-655 0,036%     |
| hsa-miR-7-3p 0,002%   | hsa-miR-106a 0,0239%    | hsa-miR-450b 0,0278%    | hsa-miR-193a-3p 0,008% | hsa-miR-28-3p 0,032%   |
|                       | hsa-miR-454 0,0238%     | hsa-miR-361-3p 0,0267%  | hsa-miR-296-3p 0,008%  | hsa-miR-380-3p 0,032%  |
|                       | hsa-miR-769 0,0236%     | hsa-miR-504 0,0267%     | hsa-miR-505 0,008%     | hsa-miR-455 0,032%     |
|                       | hsa-miR-410 0,0228%     | hsa-miR-301b 0,0259%    | hsa-miR-576-5p 0,008%  | hsa-miR-28-5p 0,029%   |
|                       | hsa-miR-363 0,0227%     | hsa-miR-185 0,0252%     | hsa-miR-641-5p 0,008%  | hsa-miR-331-3p 0,029%  |
|                       | hsa-miR-486-3p 0,0221%  | hsa-miR-326 0,0249%     | hsa-miR-654 0,008%     | hsa-miR-656 0,029%     |
|                       | hsa-miR-185 0,0221%     | hsa-miR-539-3p 0,0240%  | hsa-miR-769 0,008%     | hsa-miR-365 0,029%     |
|                       | hsa-miR-495 0,0218%     | hsa-miR-652 0,0237%     | hsa-miR-874 0,008%     | hsa-miR-197 0,027%     |
|                       | hsa-miR-758 0,0218%     | hsa-miR-214-5p 0,0235%  | hsa-miR-548a 0,006%    | hsa-miR-421 0,026%     |
|                       | hsa-miR-425 0,0212%     | hsa-miR-744 0,0235%     | hsa-miR-105 0,006%     | hsa-miR-671-5p 0,026%  |
|                       | hsa-miR-136-5p 0,0212%  | hsa-miR-214-3p 0,0232%  | hsa-miR-381 0,006%     | hsa-miR-153 0,026%     |
|                       | hsa-miR-760 0,0202%     | hsa-miR-153 0,0224%     | hsa-miR-382-5p 0,006%  | hsa-miR-615 0,026%     |
|                       | hsa-miR-494 0,0191%     | hsa-miR-382-3p 0,0224%  | hsa-miR-411-3p 0,006%  | hsa-miR-382-3p 0,025%  |
|                       | hsa-miR-409-5p 0,0191%  | hsa-miR-187-5p 0,0224%  | hsa-miR-485-5p 0,006%  | hsa-miR-18b 0,024%     |
|                       | hsa-miR-542-3p 0,0190%  | hsa-miR-485-5p 0,0217%  | hsa-miR-628-5p 0,006%  | hsa-miR-339-3p 0,024%  |
|                       | hsa-miR-361-3p 0,0188%  | hsa-miR-887 0,0214%     | hsa-miR-876-3p 0,006%  | hsa-miR-486-3p 0,024%  |
|                       | hsa-miR-181d 0,0186%    | hsa-miR-32 0,0211%      | hsa-miR-129-3p 0,005%  | hsa-miR-299-5p 0,024%  |
|                       | hsa-miR-339-3p 0,0176%  | hsa-miR-665 0,0208%     | hsa-miR-138 0,005%     | hsa-miR-192 0,022%     |
|                       | hsa-miR-379 0,0174%     | hsa-miR-431 0,0207%     | hsa-miR-187-3p 0,005%  | hsa-miR-507 0,022%     |
|                       | hsa-miR-224 0,0164%     | hsa-miR-218 0,0206%     | hsa-miR-200a 0,005%    | hsa-miR-499 0,022%     |
|                       | hsa-miR-188-5p 0,0161%  | hsa-miR-193a-5p 0,0205% | hsa-miR-200c 0,005%    | hsa-miR-590-3p 0,021%  |
|                       | hsa-miR-296-5p 0,0157%  | hsa-miR-380-3p 0,0201%  | hsa-miR-296-5p 0,005%  | hsa-miR-452-3p 0,021%  |
|                       | hsa-miR-382-5p 0,0149%  | hsa-miR-769 0,0200%     | hsa-miR-331-5p 0,005%  | hsa-miR-574-5p 0,020%  |
|                       | hsa-miR-32 0,0147%      | hsa-miR-208b 0,0199%    | hsa-miR-34b-5p 0,005%  | hsa-miR-450b 0,020%    |
|                       | hsa-miR-629 0,0146%     | hsa-miR-485-3p 0,0190%  | hsa-miR-34c 0,005%     | hsa-miR-29c 0,020%     |
|                       | hsa-miR-941-5p 0,0145%  | hsa-miR-107 0,0179%     | hsa-miR-409-5p 0,005%  | hsa-miR-194 0,019%     |
|                       | hsa-miR-561-5p 0,0140%  | hsa-miR-590-5p 0,0175%  | hsa-miR-487b 0,005%    | hsa-miR-375 0,019%     |
|                       | hsa-miR-326 0,0137%     | hsa-miR-194 0,0161%     | hsa-miR-504 0,005%     | hsa-miR-181c 0,019%    |
|                       | hsa-miR-338 0,0134%     | hsa-miR-454 0,0161%     | hsa-miR-513b 0,005%    | hsa-miR-296-3p 0,018%  |
|                       | hsa-miR-205 0,0129%     | hsa-miR-768-5p 0,0159%  | hsa-miR-548d-5p 0,005% | hsa-miR-551a 0,018%    |
|                       | hsa-miR-450a 0,0127%    | hsa-miR-181d 0,0159%    | hsa-miR-671-3p 0,005%  | hsa-miR-181d 0,018%    |

|                 |         |                 |         |                 |        |                 |        |
|-----------------|---------|-----------------|---------|-----------------|--------|-----------------|--------|
| hsa-miR-598-3p  | 0,0120% | hsa-miR-886-3p  | 0,0158% | hsa-miR-935     | 0,005% | hsa-miR-331-5p  | 0,018% |
| hsa-miR-20b     | 0,0114% | hsa-miR-188-3p  | 0,0154% | hsa-miR-376a    | 0,005% | hsa-miR-188-3p  | 0,016% |
| hsa-miR-493-3p  | 0,0112% | hsa-miR-338     | 0,0152% | hsa-miR-376a-3p | 0,005% | hsa-miR-592     | 0,015% |
| hsa-miR-499     | 0,0108% | hsa-miR-886-5p  | 0,0149% | hsa-miR-548a-3p | 0,003% | hsa-miR-485-3p  | 0,015% |
| hsa-miR-135a    | 0,0107% | hsa-miR-132     | 0,0146% | hsa-miR-941-5p  | 0,003% | hsa-miR-574-3p  | 0,015% |
| hsa-miR-33a     | 0,0094% | hsa-miR-190     | 0,0146% | hsa-miR-141     | 0,003% | hsa-miR-504     | 0,015% |
| hsa-miR-95      | 0,0094% | hsa-miR-656     | 0,0144% | hsa-miR-147b    | 0,003% | hsa-miR-582-5p  | 0,015% |
| hsa-miR-383     | 0,0094% | hsa-miR-598-3p  | 0,0138% | hsa-miR-192     | 0,003% | hsa-miR-589     | 0,014% |
| hsa-miR-487a    | 0,0093% | hsa-miR-505     | 0,0126% | hsa-miR-219     | 0,003% | hsa-miR-193a-5p | 0,014% |
| hsa-miR-376a-5p | 0,0092% | hsa-miR-627-5p  | 0,0124% | hsa-miR-299-3p  | 0,003% | hsa-miR-496-3p  | 0,013% |
| hsa-miR-887     | 0,0090% | hsa-miR-7       | 0,0117% | hsa-miR-339-3p  | 0,003% | hsa-miR-544-3p  | 0,013% |
| hsa-miR-768-5p  | 0,0090% | hsa-miR-421     | 0,0116% | hsa-miR-370     | 0,003% | hsa-miR-20b     | 0,013% |
| hsa-miR-768-3p  | 0,0084% | hsa-miR-514     | 0,0116% | hsa-miR-377     | 0,003% | hsa-miR-412-5p  | 0,012% |
| hsa-miR-187-5p  | 0,0084% | hsa-miR-181c    | 0,0115% | hsa-miR-409-3p  | 0,003% | hsa-miR-224     | 0,012% |
| hsa-miR-421     | 0,0082% | hsa-miR-758     | 0,0110% | hsa-miR-411-5p  | 0,003% | hsa-miR-508-3p  | 0,012% |
| hsa-miR-766     | 0,0081% | hsa-miR-592     | 0,0105% | hsa-miR-486-5p  | 0,003% | hsa-miR-887     | 0,011% |
| hsa-miR-34b-5p  | 0,0079% | hsa-miR-509-3p  | 0,0105% | hsa-miR-493-3p  | 0,003% | hsa-miR-105     | 0,011% |
| hsa-miR-874     | 0,0079% | hsa-miR-92b     | 0,0100% | hsa-miR-494     | 0,003% | hsa-miR-485-5p  | 0,011% |
| hsa-miR-452-5p  | 0,0073% | hsa-miR-941     | 0,0098% | hsa-miR-495     | 0,003% | hsa-miR-328     | 0,011% |
| hsa-miR-217     | 0,0070% | hsa-miR-629     | 0,0093% | hsa-miR-514     | 0,003% | hsa-miR-193a-3p | 0,011% |
| hsa-miR-550-3p  | 0,0070% | hsa-miR-766     | 0,0088% | hsa-miR-542-5p  | 0,003% | hsa-miR-137     | 0,011% |
| hsa-miR-665     | 0,0070% | hsa-miR-20b     | 0,0087% | hsa-miR-548b-3p | 0,003% | hsa-miR-154-5p  | 0,010% |
| hsa-miR-154-3p  | 0,0067% | hsa-miR-874     | 0,0084% | hsa-miR-576-3p  | 0,003% | hsa-miR-146b    | 0,010% |
| hsa-miR-138     | 0,0065% | hsa-miR-590-3p  | 0,0078% | hsa-miR-585-3p  | 0,003% | hsa-miR-326     | 0,009% |
| hsa-miR-7       | 0,0061% | hsa-miR-192     | 0,0065% | hsa-miR-589     | 0,003% | hsa-miR-627-5p  | 0,009% |
| hsa-miR-449a    | 0,0059% | hsa-miR-1226    | 0,0064% | hsa-miR-590-5p  | 0,003% | hsa-miR-876-5p  | 0,009% |
| hsa-miR-330-3p  | 0,0058% | hsa-miR-486-3p  | 0,0059% | hsa-miR-627-5p  | 0,003% | hsa-miR-330-5p  | 0,009% |
| hsa-miR-886-3p  | 0,0055% | hsa-miR-154-5p  | 0,0058% | hsa-miR-628-3p  | 0,003% | hsa-miR-877     | 0,009% |
| hsa-miR-589     | 0,0055% | hsa-miR-539-5p  | 0,0058% | hsa-miR-642     | 0,003% | hsa-miR-509-3p  | 0,009% |
| hsa-miR-1229    | 0,0043% | hsa-miR-517a    | 0,0057% | hsa-miR-7-3p    | 0,003% | hsa-miR-132     | 0,009% |
| hsa-miR-651     | 0,0043% | hsa-miR-517b    | 0,0057% | hsa-miR-886-3p  | 0,003% | hsa-miR-380-5p  | 0,008% |
| hsa-miR-337-3p  | 0,0042% | hsa-miR-190b    | 0,0053% | hsa-miR-181d    | 0,002% | hsa-miR-7-3p    | 0,008% |
| hsa-miR-935     | 0,0041% | hsa-miR-518a-5p | 0,0053% |                 |        | hsa-miR-582-3p  | 0,007% |
| hsa-miR-590-3p  | 0,0041% | hsa-miR-527-5p  | 0,0053% |                 |        | hsa-miR-497     | 0,007% |
| hsa-miR-431     | 0,0041% | hsa-miR-770     | 0,0053% |                 |        | hsa-miR-941     | 0,007% |
| hsa-miR-136-3p  | 0,0040% | hsa-miR-7-5p    | 0,0053% |                 |        | hsa-miR-337-5p  | 0,007% |
| hsa-miR-301b    | 0,0040% | hsa-miR-584     | 0,0052% |                 |        | hsa-miR-584     | 0,007% |
| hsa-miR-105     | 0,0039% | hsa-miR-615     | 0,0048% |                 |        | hsa-miR-561-5p  | 0,006% |
| hsa-miR-429     | 0,0039% | hsa-miR-337-5p  | 0,0047% |                 |        | hsa-miR-539-5p  | 0,006% |
| hsa-miR-192     | 0,0036% | hsa-miR-877     | 0,0046% |                 |        | hsa-miR-597     | 0,006% |
| hsa-miR-7-5p    | 0,0031% | hsa-miR-380-5p  | 0,0045% |                 |        | hsa-miR-671-3p  | 0,006% |
| hsa-miR-190     | 0,0030% | hsa-miR-653-3p  | 0,0043% |                 |        | hsa-miR-942     | 0,006% |
| hsa-miR-203-3p  | 0,0030% | hsa-miR-544-3p  | 0,0043% |                 |        | hsa-miR-766     | 0,005% |
| hsa-miR-450b    | 0,0030% | hsa-miR-1229    | 0,0041% |                 |        | hsa-miR-770     | 0,005% |
| hsa-miR-542-5p  | 0,0030% | hsa-miR-513a-5p | 0,0036% |                 |        | hsa-miR-542-5p  | 0,005% |
| hsa-miR-582-3p  | 0,0029% | hsa-miR-330-3p  | 0,0035% |                 |        | hsa-miR-204     | 0,005% |
| hsa-miR-154-5p  | 0,0026% | hsa-miR-491     | 0,0035% |                 |        | hsa-miR-449a    | 0,005% |
| hsa-miR-576-5p  | 0,0026% | hsa-miR-455     | 0,0033% |                 |        | hsa-miR-200c    | 0,005% |
| hsa-miR-491     | 0,0024% | hsa-miR-508-3p  | 0,0033% |                 |        | hsa-miR-1226    | 0,004% |
| hsa-miR-509-3p  | 0,0024% | hsa-miR-941-5p  | 0,0033% |                 |        | hsa-miR-576-5p  | 0,004% |
| hsa-miR-873     | 0,0024% | hsa-miR-34c     | 0,0032% |                 |        | hsa-miR-147b    | 0,004% |
| hsa-miR-1237    | 0,0022% | hsa-miR-942     | 0,0032% |                 |        | hsa-miR-653-3p  | 0,004% |
| hsa-miR-412-3p  | 0,0022% | hsa-miR-653-5p  | 0,0030% |                 |        | hsa-miR-651     | 0,004% |
| hsa-miR-541-3p  | 0,0022% | hsa-miR-582-5p  | 0,0029% |                 |        | hsa-miR-200a    | 0,004% |
| hsa-miR-551a    | 0,0022% | hsa-miR-550-5p  | 0,0026% |                 |        | hsa-miR-618     | 0,004% |
| hsa-miR-550-5p  | 0,0022% | hsa-miR-135b    | 0,0026% |                 |        | hsa-miR-624-3p  | 0,003% |
| hsa-miR-188-3p  | 0,0020% | hsa-miR-105     | 0,0025% |                 |        | hsa-miR-941-5p  | 0,003% |

hsa-miR-190b 0,0020%  
hsa-miR-331-5p 0,0020%  
hsa-miR-767 0,0020%  
hsa-miR-153 0,0014%  
hsa-miR-212 0,0014%  
hsa-miR-216a 0,0014%  
hsa-miR-371-5p 0,0014%  
hsa-miR-380-3p 0,0014%  
hsa-miR-382-3p 0,0014%  
hsa-miR-412-5p 0,0014%  
hsa-miR-885-3p 0,0014%  
hsa-miR-885-5p 0,0014%  
hsa-miR-346 0,0014%  
hsa-miR-376b 0,0014%  
hsa-miR-496-3p 0,0014%  
hsa-miR-496-5p 0,0014%  
hsa-miR-675 0,0014%  
hsa-miR-877 0,0014%  
hsa-miR-193a-3p 0,0012%  
hsa-miR-330-5p 0,0012%  
hsa-miR-514 0,0012%  
hsa-miR-579-5p 0,0012%  
hsa-miR-891a 0,0012%  
hsa-miR-184 0,0010%  
hsa-miR-33b 0,0010%  
hsa-miR-34b-3p 0,0010%  
hsa-miR-511-5p 0,0010%  
hsa-miR-522 0,0010%  
hsa-miR-592 0,0010%  
hsa-miR-628-5p 0,0010%  
hsa-miR-18b 0,0005%

hsa-miR-141 0,0024%  
hsa-miR-200b 0,0024%  
hsa-miR-429 0,0024%  
hsa-miR-203-3p 0,0023%  
hsa-miR-496-5p 0,0023%  
hsa-miR-507 0,0023%  
hsa-miR-935 0,0022%  
hsa-miR-671-3p 0,0022%  
hsa-miR-767 0,0021%  
hsa-miR-876-3p 0,0021%  
hsa-miR-885-5p 0,0021%  
hsa-miR-452-5p 0,0020%  
hsa-miR-625 0,0020%  
hsa-miR-18b 0,0017%  
hsa-miR-215 0,0013%  
hsa-miR-628-3p 0,0013%  
hsa-miR-184 0,0012%  
hsa-miR-496-3p 0,0012%  
hsa-miR-551a 0,0012%  
hsa-miR-589 0,0012%  
hsa-miR-876-5p 0,0012%  
hsa-miR-129-3p 0,0012%  
hsa-miR-204 0,0012%  
hsa-miR-506 0,0012%  
hsa-miR-513a-3p 0,0012%  
hsa-miR-513c 0,0012%  
hsa-miR-548b-3p 0,0012%  
hsa-miR-330-5p 0,0010%  
hsa-miR-383 0,0010%  
hsa-miR-489 0,0010%  
hsa-miR-873 0,0010%  
hsa-miR-122 0,0010%  
hsa-miR-200c 0,0010%  
hsa-miR-296-3p 0,0010%  
hsa-miR-331-5p 0,0010%  
hsa-miR-34b-5p 0,0010%  
hsa-miR-675 0,0010%  
hsa-miR-760 0,0010%  
hsa-miR-768-3p 0,0010%  
hsa-miR-937 0,0010%  
hsa-miR-200a 0,0005%

hsa-miR-545 0,003%  
hsa-miR-141 0,003%  
hsa-miR-195 0,003%  
hsa-miR-363 0,003%  
hsa-miR-496-5p 0,003%  
hsa-miR-488 0,003%  
hsa-miR-544-5p 0,003%  
hsa-miR-361-3p 0,003%  
hsa-miR-760 0,003%  
hsa-miR-330-3p 0,003%  
hsa-miR-506 0,003%  
hsa-miR-548b-3p 0,003%  
hsa-miR-548b-5p 0,003%  
hsa-miR-550-3p 0,002%  
hsa-miR-940-3p 0,002%  
hsa-miR-190b 0,002%  
hsa-miR-876-3p 0,002%  
hsa-miR-628-5p 0,002%  
hsa-miR-767 0,002%  
hsa-miR-95 0,002%  
hsa-miR-1229 0,002%  
hsa-miR-412-3p 0,002%  
hsa-miR-302a 0,002%  
hsa-miR-550-5p 0,002%  
hsa-miR-187-5p 0,002%  
hsa-miR-296-5p 0,002%  
hsa-miR-937 0,002%  
hsa-miR-142-3p 0,001%  
hsa-miR-187-3p 0,001%  
hsa-miR-509-5p 0,001%  
hsa-miR-628-3p 0,001%  
hsa-miR-31 0,001%  
hsa-miR-874 0,001%  
hsa-miR-200b 0,001%  
hsa-miR-541-5p 0,001%  
hsa-miR-548a-5p 0,001%  
hsa-miR-577 0,001%  
hsa-miR-580 0,001%  
hsa-miR-653-5p 0,001%  
hsa-miR-145 0,001%  
hsa-miR-548c 0,001%  
hsa-miR-548d-5p 0,001%  
hsa-miR-570 0,001%  
hsa-miR-605-5p 0,001%  
hsa-miR-624-5p 0,001%  
hsa-miR-184 0,001%  
hsa-miR-429 0,001%  
hsa-miR-451 0,001%  
hsa-miR-541-3p 0,001%  
hsa-miR-203-3p 0,001%  
hsa-miR-491 0,001%  
hsa-miR-579-3p 0,001%  
hsa-miR-625 0,001%  
hsa-miR-215 0,001%
