# Supplementary material
Source: PubMed Central journal article supplement (PMC5207039)
Supplement: NIHMS837814-supplement-Table_S2.pdf [file NIHMS837814-supplement-Table_S2.pdf]

## Supplementary Table S2

Top 5 muscle-enriched miRNAs. Percentages representing the relative abundance of the indicated miRNAs in the small RNA libraries analyzed.

| miRNA        | muscle | ERMS  | ARMS  | PRMS  | RMS cells |
|--------------|--------|-------|-------|-------|-----------|
| hsa-miR-1    | 36,60% | 0,20% | 1,40% | 0,50% | 0,20%     |
| hsa-miR-133a | 20,10% | 0,30% | 1,90% | 0,30% | 0,30%     |
| hsa-miR-378  | 4,00%  | 0,10% | 0,90% | 0,10% | 0,50%     |
| hsa-miR-206  | 3,20%  | 1,10% | 1,40% | 3,70% | 1,80%     |
| hsa-miR-22   | 2,60%  | 0,40% | 1,30% | 0,40% | 0,80%     |
