# Supplementary material
Source: PubMed Central journal article supplement (PMC5207039)
Supplement: NIHMS837814-supplement-Table_S3.pdf [file NIHMS837814-supplement-Table_S3.pdf]

## Supplementary Table S3

List of miR-22 predicted targets. Comprehensive list of all predicted miR-22 targets found among the transcripts downregulated in RD18 NpBI-22 cells in the induced (IND) condition. The EIMMo miRNA target prediction server (<http://www.mirz.unibas.ch/EIMMo2/>) was used to perform the analysis.

|              | Gene description                                                                                                                                           | Expected no. of seed matches under evolutionary selective pressure | Location of the seed matches within the 3'UTR |
|--------------|------------------------------------------------------------------------------------------------------------------------------------------------------------|--------------------------------------------------------------------|-----------------------------------------------|
| NM_005188    | Homo sapiens Cas-Br-M (murine) ecotropic retroviral transforming sequence (CBL), mRNA.                                                                     | 1,4717                                                             | 3'UTR ---X-----X-----X-X                      |
| NM_002868    | Homo sapiens RAB5B, member RAS oncogene family (RAB5B), mRNA.                                                                                              | 1,3413                                                             | 3'UTR -X---X---X---                           |
| NM_002293    | Homo sapiens laminin, gamma 1 (formerly LAMB2) (LAMC1), mRNA.                                                                                              | 1,2831                                                             | 3'UTR ---XX-----                              |
| NM_001039577 | Homo sapiens cyclin L2 (CCNL2), transcript variant 2, mRNA.                                                                                                | 1,2563                                                             | 3'UTR --X-----X-----X--X--                    |
| NM_025250    | Homo sapiens tweety homolog 3 (Drosophila) (TTYH3), mRNA.                                                                                                  | 1,1336                                                             | 3'UTR ---X--XX-----                           |
| NM_033224    | Homo sapiens purine-rich element binding protein B (PURB), mRNA.                                                                                           | 1,0369                                                             | 3'UTR X-----X-----                            |
| NM_003388    | Homo sapiens CAP-GLY domain containing linker protein 2 (CLIP2), transcript variant 1, mRNA.                                                               | 1,0179                                                             | 3'UTR ---X--X-X-                              |
| NM_022497    | Homo sapiens mitochondrial ribosomal protein S25 (MRPS25), nuclear gene encoding mitochondrial protein, mRNA.                                              | 1,0177                                                             | 3'UTR -X-----XX--                             |
| NM_024090    | Homo sapiens ELOVL family member 6, elongation of long chain fatty acids (FEN1/Elo2, SUR4/Elo3-like, yeast) (ELOVL6), mRNA.                                | 0,9015                                                             | 3'UTR -X--X-----                              |
| NM_005909    | Homo sapiens microtubule-associated protein 1B (MAP1B), mRNA.                                                                                              | 0,7875                                                             | 3'UTR -----X-----X--                          |
| NM_198046    | Homo sapiens zinc finger, DHHC-type containing 16 (ZDHC16), transcript variant 5, mRNA.                                                                    | 0,7702                                                             | 3'UTR XX-                                     |
| NM_018214    | Homo sapiens leucine rich repeat containing 1 (LRRC1), mRNA.                                                                                               | 0,6033                                                             | 3'UTR --X----                                 |
| NM_003931    | Homo sapiens WAS protein family, member 1 (WASF1), transcript variant 1, mRNA.                                                                             | 0,6033                                                             | 3'UTR --X--                                   |
| NM_024334    | Homo sapiens transmembrane protein 43 (TMEM43), mRNA.                                                                                                      | 0,5938                                                             | 3'UTR -XX-----                                |
| NM_001315    | Homo sapiens mitogen-activated protein kinase 14 (MAPK14), transcript variant 1, mRNA.                                                                     | 0,5893                                                             | 3'UTR -----X-----                             |
| NM_003315    | Homo sapiens DnaJ (Hsp40) homolog, subfamily C, member 7 (DNAJC7), mRNA.                                                                                   | 0,5869                                                             | 3'UTR -X                                      |
| NM_172316    | Homo sapiens Meis homeobox 2 (MEIS2), transcript variant h, mRNA.                                                                                          | 0,5865                                                             | 3'UTR ----X--                                 |
| NM_001431    | Homo sapiens erythrocyte membrane protein band 4.1-like 2 (EPB41L2), mRNA.                                                                                 | 0,5657                                                             | 3'UTR ----X--                                 |
| NM_003887    | Homo sapiens development and differentiation enhancing factor 2 (DDEF2), mRNA.                                                                             | 0,5591                                                             | 3'UTR -----X---X-                             |
| NM_001080419 | Homo sapiens unkempt homolog (Drosophila) (UNK), mRNA.                                                                                                     | 0,5557                                                             | 3'UTR ----X--                                 |
| NM_002305    | Homo sapiens lectin, galactoside-binding, soluble, 1 (galectin 1) (LGALS1), mRNA.                                                                          | 0,5534                                                             | 3'UTR X                                       |
| NM_002523    | Homo sapiens neuronal pentraxin II (NPTX2), mRNA.                                                                                                          | 0,5533                                                             | 3'UTR ----X--                                 |
| NM_002128    | Homo sapiens high-mobility group box 1 (HMGB1), mRNA.                                                                                                      | 0,5533                                                             | 3'UTR --X-----                                |
| NM_032530    | Homo sapiens zinc finger protein 594 (ZNF594), mRNA.                                                                                                       | 0,5472                                                             | 3'UTR --XX-----                               |
| NM_001001890 | Homo sapiens runt-related transcription factor 1 (acute myeloid leukemia 1; aml1 oncogene) (RUNX1), transcript variant 2, mRNA.                            | 0,5275                                                             | 3'UTR -----X-----X-                           |
| NM_032758    | Homo sapiens PHD finger protein 5A (PHF5A), mRNA.                                                                                                          | 0,5253                                                             | 3'UTR -XX--                                   |
| NM_147223    | Homo sapiens nuclear receptor coactivator 1 (NCOA1), transcript variant 2, mRNA.                                                                           | 0,4955                                                             | 3'UTR ---X-----                               |
| NM_194247    | Homo sapiens heterogeneous nuclear ribonucleoprotein A3 (HNRPA3), mRNA.                                                                                    | 0,495                                                              | 3'UTR -X-----                                 |
| NM_020135    | Homo sapiens Werner helicase interacting protein 1 (WRNIP1), transcript variant 1, mRNA.                                                                   | 0,4819                                                             | 3'UTR -X-                                     |
| NM_002541    | Homo sapiens oxoglutarate (alpha-ketoglutarate) dehydrogenase (lipoamide) (OGDH), nuclear gene encoding mitochondrial protein, transcript variant 1, mRNA. | 0,4665                                                             | 3'UTR ---X--                                  |
| NM_002883    | Homo sapiens Ran GTPase activating protein 1 (RANGAP1), mRNA.                                                                                              | 0,4665                                                             | 3'UTR --X--X                                  |
| NM_006283    | Homo sapiens transforming, acidic coiled-coil containing protein 1 (TACC1), mRNA.                                                                          | 0,4645                                                             | 3'UTR -----X--X-----                          |
| NM_005540    | Homo sapiens inositol polyphosphate-5-phosphatase, 75kDa (INPP5B), nuclear gene encoding mitochondrial protein, mRNA.                                      | 0,4637                                                             | 3'UTR -X-----                                 |
| NM_003137    | Homo sapiens SFRS protein kinase 1 (SRPK1), mRNA.                                                                                                          | 0,4252                                                             | 3'UTR -----X-                                 |
| NM_001079559 | Homo sapiens heterogeneous nuclear ribonucleoprotein U-like 2 (HNRPUL2), mRNA.                                                                             | 0,4252                                                             | 3'UTR --X-                                    |
| NM_000593    | Homo sapiens transporter 1, ATP-binding cassette, sub-family B (MDR/TAP) (TAP1), mRNA.                                                                     | 0,4252                                                             | 3'UTR X--                                     |
| NM_004879    | Homo sapiens etoposide induced 2.4 mRNA (EI24), transcript variant 1, mRNA.                                                                                | 0,4061                                                             | 3'UTR X----                                   |

|              |                                                                                                              |                          |
|--------------|--------------------------------------------------------------------------------------------------------------|--------------------------|
| NM_006227    | Homo sapiens phospholipid transfer protein (PLTP), transcript variant 1, mRNA.                               | 0,3616 3'UTR X-          |
| NM_032034    | Homo sapiens solute carrier family 4, sodium borate transporter, member 11 (SLC4A11), mRNA.                  | 0,3289 3'UTR -X-         |
| NM_003616    | Homo sapiens survival of motor neuron protein interacting protein 1 (SIP1), transcript variant alpha, mRNA.  | 0,3269 3'UTR -X--        |
| NM_006460    | Homo sapiens hexamethylene bis-acetamide inducible 1 (HEXIM1), mRNA.                                         | 0,315 3'UTR ----X----    |
| NM_032765    | Homo sapiens tripartite motif-containing 52 (TRIM52), mRNA.                                                  | 0,2911 3'UTR ---X--      |
| NM_201428    | Homo sapiens reticulon 3 (RTN3), transcript variant 2, mRNA.                                                 | 0,2368 3'UTR -----X---   |
| NM_178858    | Homo sapiens sideroflexin 2 (SFXN2), mRNA.                                                                   | 0,2342 3'UTR ---X----    |
| NM_004838    | Homo sapiens homer homolog 3 (Drosophila) (HOMER3), mRNA.                                                    | 0,2342 3'UTR -X          |
| NM_013296    | Homo sapiens G-protein signaling modulator 2 (AGS3-like, C. elegans) (GPSM2), mRNA.                          | 0,2342 3'UTR -X-         |
| NM_005990    | Homo sapiens serine/threonine kinase 10 (STK10), mRNA.                                                       | 0,2342 3'UTR X-----      |
| NM_003721    | Homo sapiens regulatory factor X-associated ankyrin-containing protein (RFXANK), transcript variant 1, mRNA. | 0,2342 3'UTR X-          |
| NM_000405    | Homo sapiens GM2 ganglioside activator (GM2A), mRNA.                                                         | 0,2323 3'UTR -----X--    |
| NM_013237    | Homo sapiens PRELI domain containing 1 (PRELID1), mRNA.                                                      | 0,2323 3'UTR -X-         |
| NM_002526    | Homo sapiens 5'-nucleotidase, ecto (CD73) (NT5E), mRNA.                                                      | 0,2323 3'UTR -----X--    |
| NM_000310    | Homo sapiens palmitoyl-protein thioesterase 1 (ceroid-lipofuscinosis, neuronal 1, infantile) (PPT1), mRNA.   | 0,2323 3'UTR ----X---    |
| NM_001813    | Homo sapiens centromere protein E, 312kDa (CENPE), mRNA.                                                     | 0,2322 3'UTR X--         |
| NM_001099404 | Homo sapiens sodium channel, voltage-gated, type V, alpha subunit (SCN5A), transcript variant 3, mRNA.       | 0,2322 3'UTR -----X----- |
| NM_006407    | Homo sapiens ADP-ribosylation-like factor 6 interacting protein 5 (ARL6IP5), mRNA.                           | 0,2322 3'UTR X-----      |
| NM_001096    | Homo sapiens ATP citrate lyase (ACLY), transcript variant 1, mRNA.                                           | 0,1539 3'UTR ----X-      |
| NM_005928    | Homo sapiens milk fat globule-EGF factor 8 protein (MFG8), mRNA.                                             | 0,1377 3'UTR ---X-       |
| NM_001048183 | Homo sapiens phosphatase and actin regulator 4 (PHACTR4), transcript variant 1, mRNA.                        | 0,0375 3'UTR -----X----- |
